# Supplementary material for: Modification of carbon foam with 4-mercaptobenzoic acid functionalised gold nanoparticles for an application in a yeast-based microbial fuel cell
Source: Royal Society of Chemistry journal article supplement (doi:10.1039/d2ra05100a), 2022-01-01
Supplement: d2ra05100a1.pdf [file d2ra05100a1.pdf]

Electronic Supplementary Information (ESI)

**Modification of Carbon Foam with 4-Mercaptobenzoic Acid Functionalised Gold Nanoparticles for an Application in a Yeast-Based Microbial Fuel Cell**

Aliyah, Mochammad Arfin Fardiansyah Nasution, Yulia Mariana Tesa Ayudia Putri, Jarnuzi Gunlazuardi and Tribidasari Anggraningrum Ivandini\*

Department of Chemistry, Faculty of Mathematics and Natural Sciences (FMIPA), Universitas Indonesia. Kampus UI Depok, Depok 16424, Indonesia.

E-mail: [ivandini.tri@sci.ui.ac.id](mailto:ivandini.tri@sci.ui.ac.id)

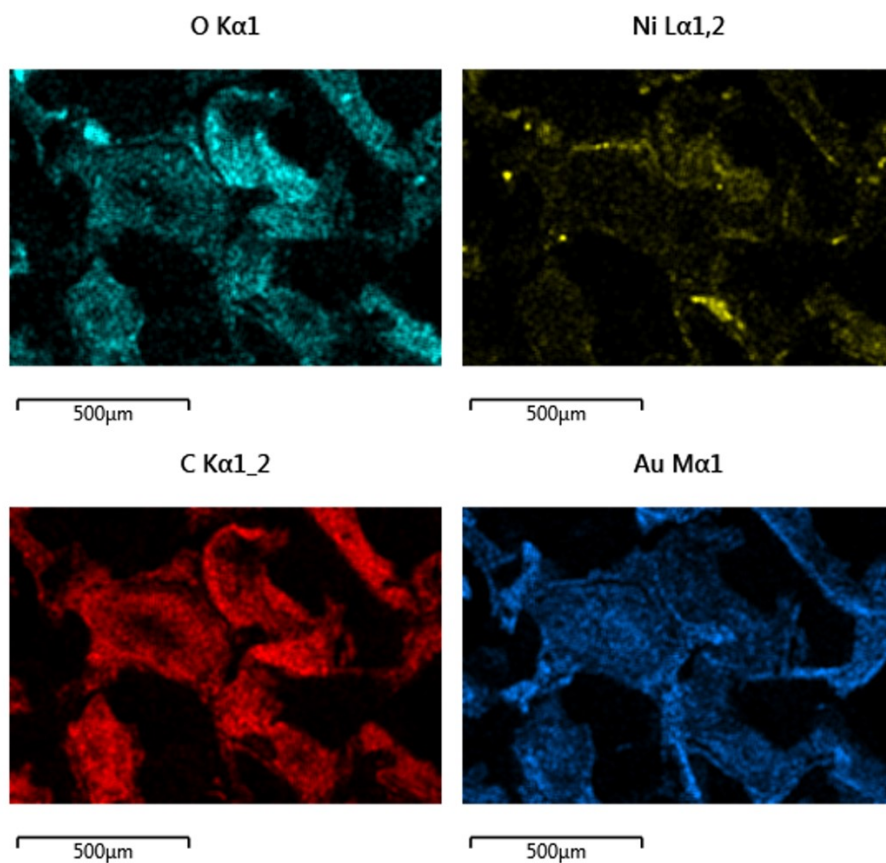

**Figure S1.** SEM-EDS mapping result of modified electrode AuNPs@CF

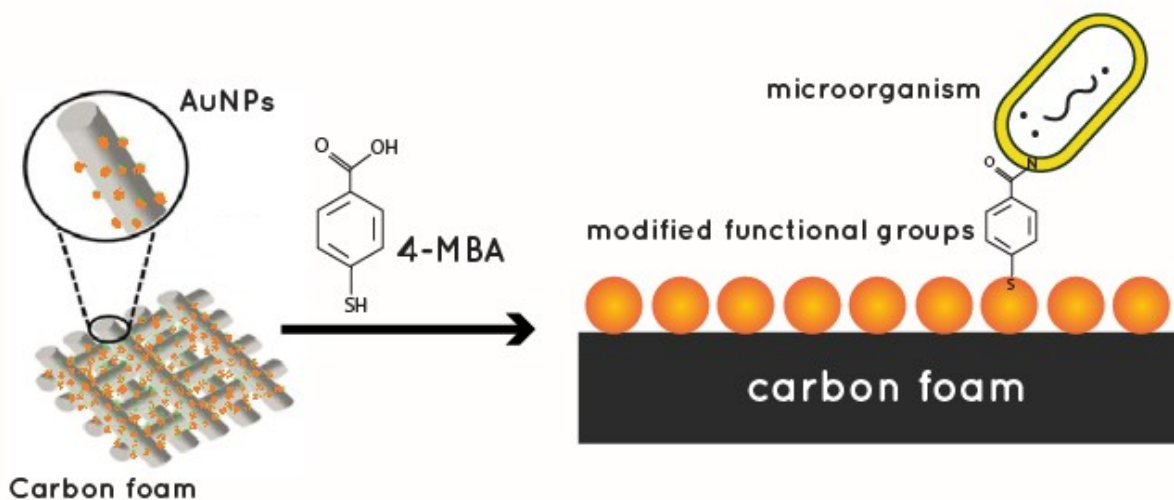

**Fig. S2** Electrode modification of 4-MBA self-assembled monolayer formed on AuNPs@CF to facilitate microbe immobilization.

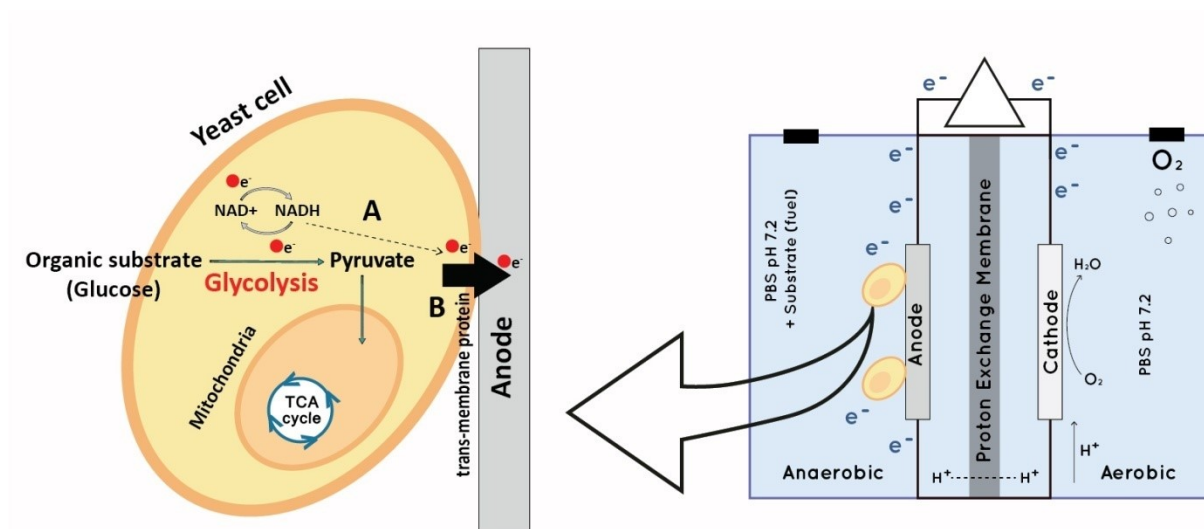

**Fig. S3** Schematic representation of the proposed EET process pathway of *C. fukuyamaensis*. (A) Electron produced via anaerobic respiration, attributed to the redox reaction of  $NAD^+$ , and (B) EET may occur through direct contact between the outer membrane protein of yeast cell and the electrode surface.
